# Supplementary material
Source: Royal Society of Chemistry journal article supplement (doi:10.1039/d6nr01066k)
Supplement: d6nr01066k1.pdf [file d6nr01066k1.pdf]

**Supplementary information for:**

**Phase Selection Behavior of Nano-Sized GaIn Liquid Alloys Governed by Mixing Enthalpy**

Bolin Sun<sup>1</sup>, Liwei Cao<sup>1</sup>, Weiyi Wu<sup>1</sup>, Mingzhe Liu<sup>1</sup>, Yanhui Chen<sup>1</sup>, Ang Li<sup>1\*</sup>, Xiaodong Han<sup>1</sup>

1. Beijing Key Lab of Microstructure and Properties of Advanced Materials, Beijing University of Technology, Beijing, 100124, China

\*Corresponding email: ang.li@bjut.edu.cn (A. Li)

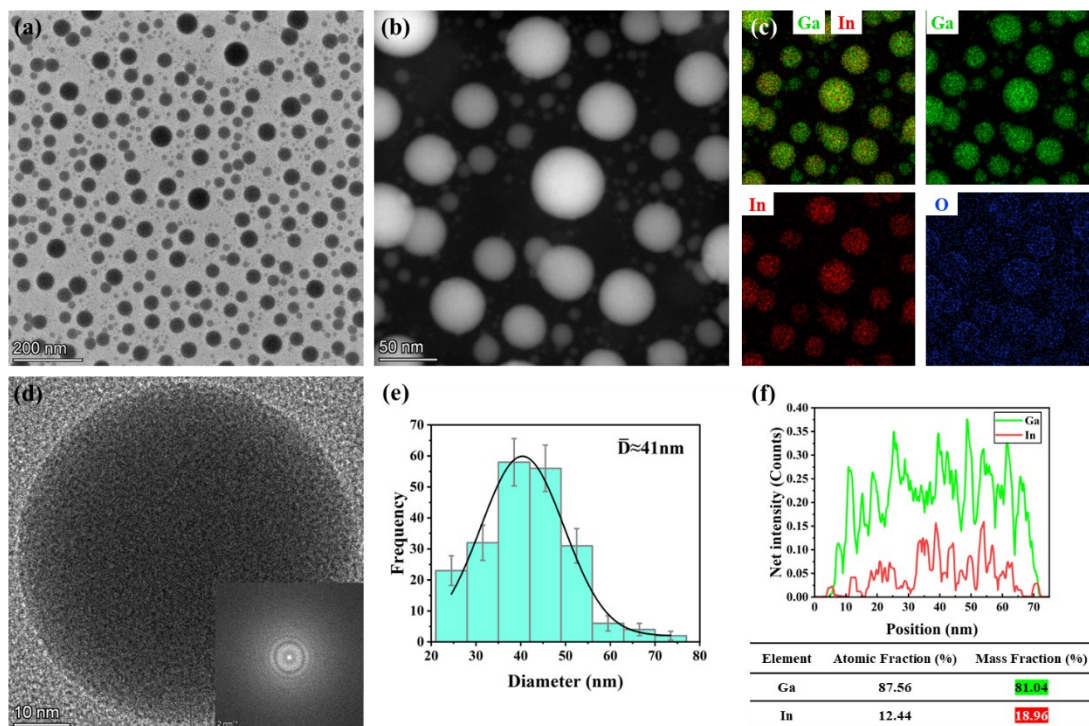

**Figure S1** Preliminary characterization of near-eutectic GaIn nanoparticles

(a) Low-magnification TEM image (b) STEM image (c) EDS elemental mapping (d) HRTEM image (e) Particle size distribution statistics (f) EDS line scan analysis

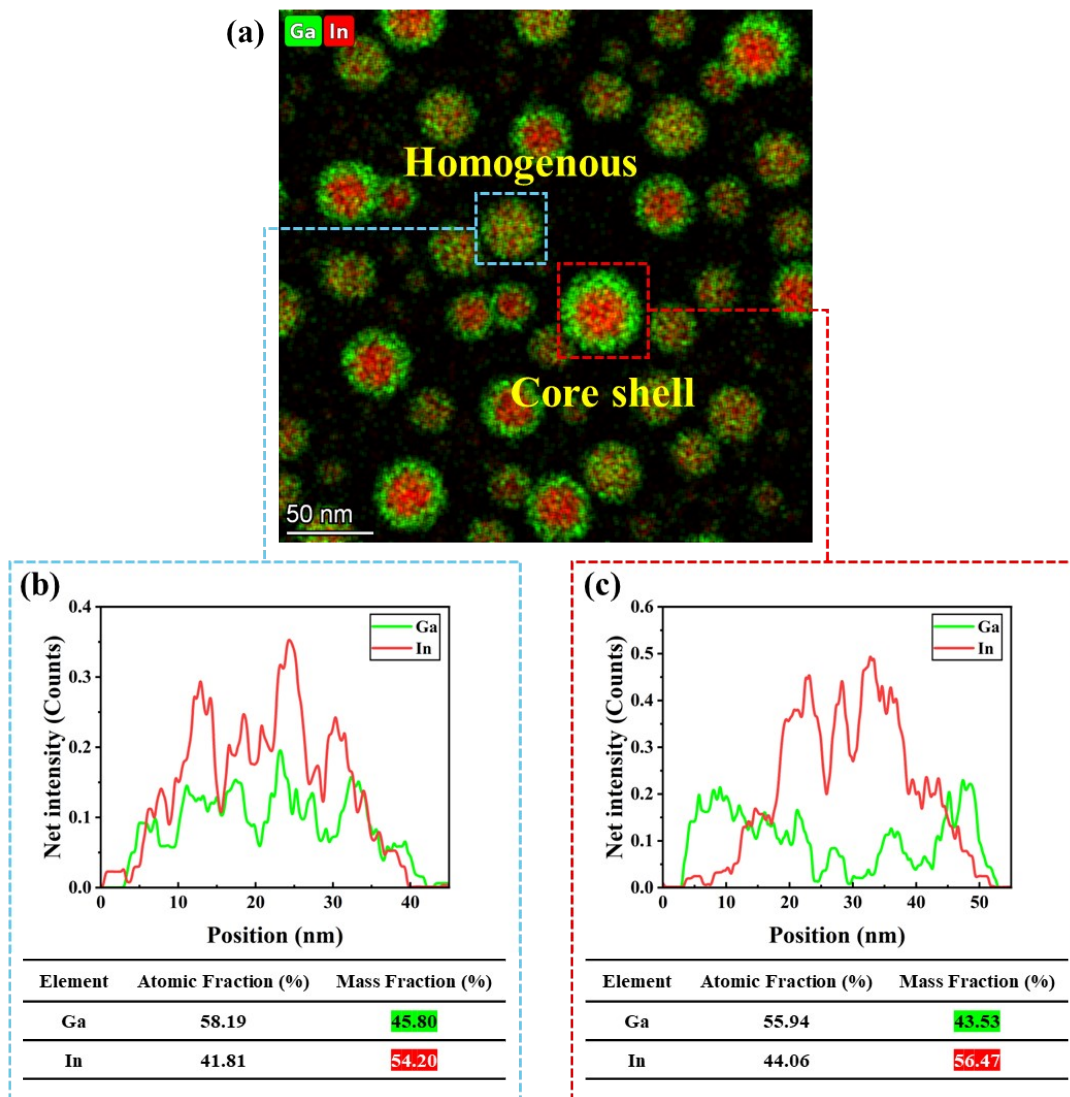

**Figure S2** Composition and structural analysis of GaIn nanoparticles with an average composition of 55 wt% In: (a) EDS elemental mapping images corresponding to the sample in Figure 4c (Ga: green, In: red), showing the coexistence of core-shell and uniform structures. (b) Line scan result of a single homogeneous nanoparticle marked by the blue dashed box in panel (a), with an average composition of Ga:In = 45.80:54.20 wt%. (c) Line scan result of a single core-shell structured nanoparticle marked by the red dashed box in panel (a), with an average composition of Ga:In = 43.53:56.47 wt%

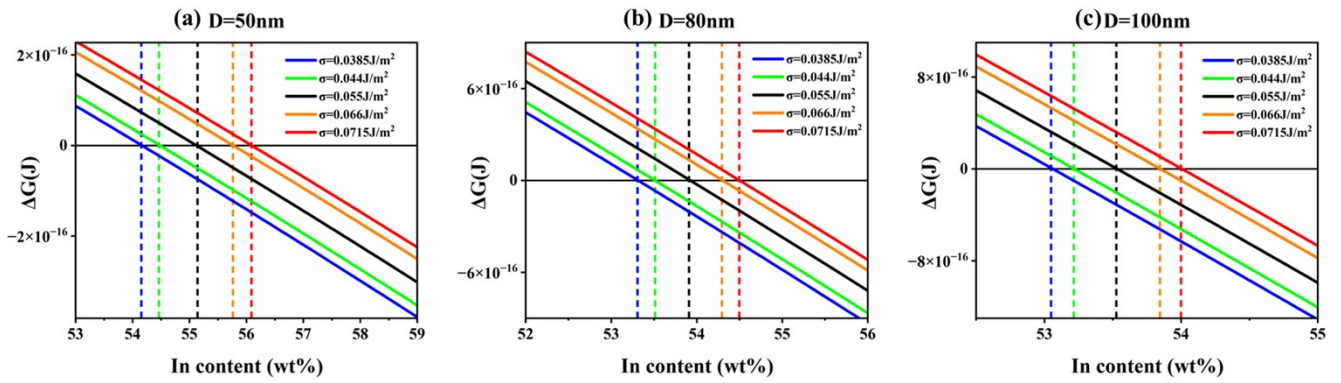

**Figure S3** Sensitivity analysis of the Gibbs free-energy change ( $\Delta G$ ) as a function of In content under different interfacial energies for GaIn nanoparticles with diameters of (a) 50 nm, (b) 80 nm, and (c) 100 nm. The baseline value is  $\sigma = 0.055 \text{ J} \cdot \text{m}^{-2}$ ; the  $\pm 30\%$  range corresponds to  $0.0385\text{--}0.0715 \text{ J} \cdot \text{m}^{-2}$ . The horizontal line indicates  $\Delta G = 0$ , and the vertical dashed lines mark the corresponding critical In contents.

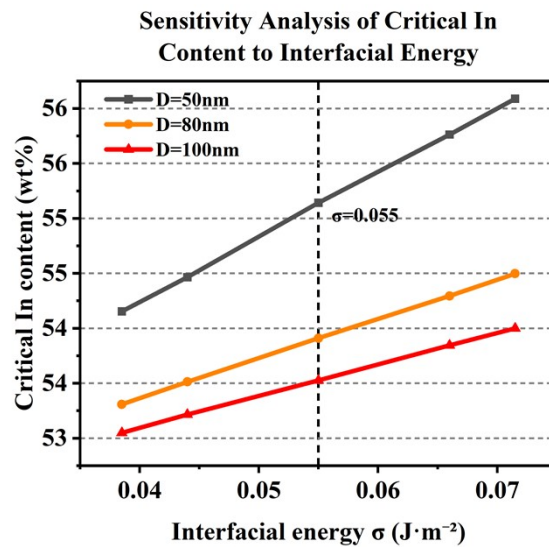

**Figure S4** Sensitivity analysis of the critical In content as a function of interfacial energy for GaIn nanoparticles with diameters of 50, 80, and 100 nm. The dashed vertical line marks the baseline value  $\sigma = 0.055 \text{ J} \cdot \text{m}^{-2}$ . Within the  $\pm 30\%$  range ( $0.0385\text{--}0.0715 \text{ J} \cdot \text{m}^{-2}$ ), the critical composition shifts only slightly, supporting the robustness of the composition-driven phase-selection trend.
